# Supplementary material
Source: PubMed Central journal article supplement (PMC4707123)
Supplement: NIHMS739986-supplement-1.pdf [file NIHMS739986-supplement-1.pdf]

## Supporting Information

**Selective ORAI1 inhibition ameliorates CNS inflammation in EAE by suppressing effector but not regulatory T cell function.**

Ulrike Kaufmann\*, Patrick J. Shaw\*, Lina Kozhaya‡, Raju Subramanian\$, Kevin Gaida†, Derya Unutmaz‡, Helen J. McBride#, Stefan Feske\*

\*Department of Pathology, and ‡Department of Microbiology, New York University School of Medicine, New York, NY 10016, USA; \$ Pharmacokinetics and Drug Metabolism, †Inflammation Research and #Discovery Toxicology, Amgen, Inc. Thousand Oaks, CA 91320, USA

## Supporting Figures

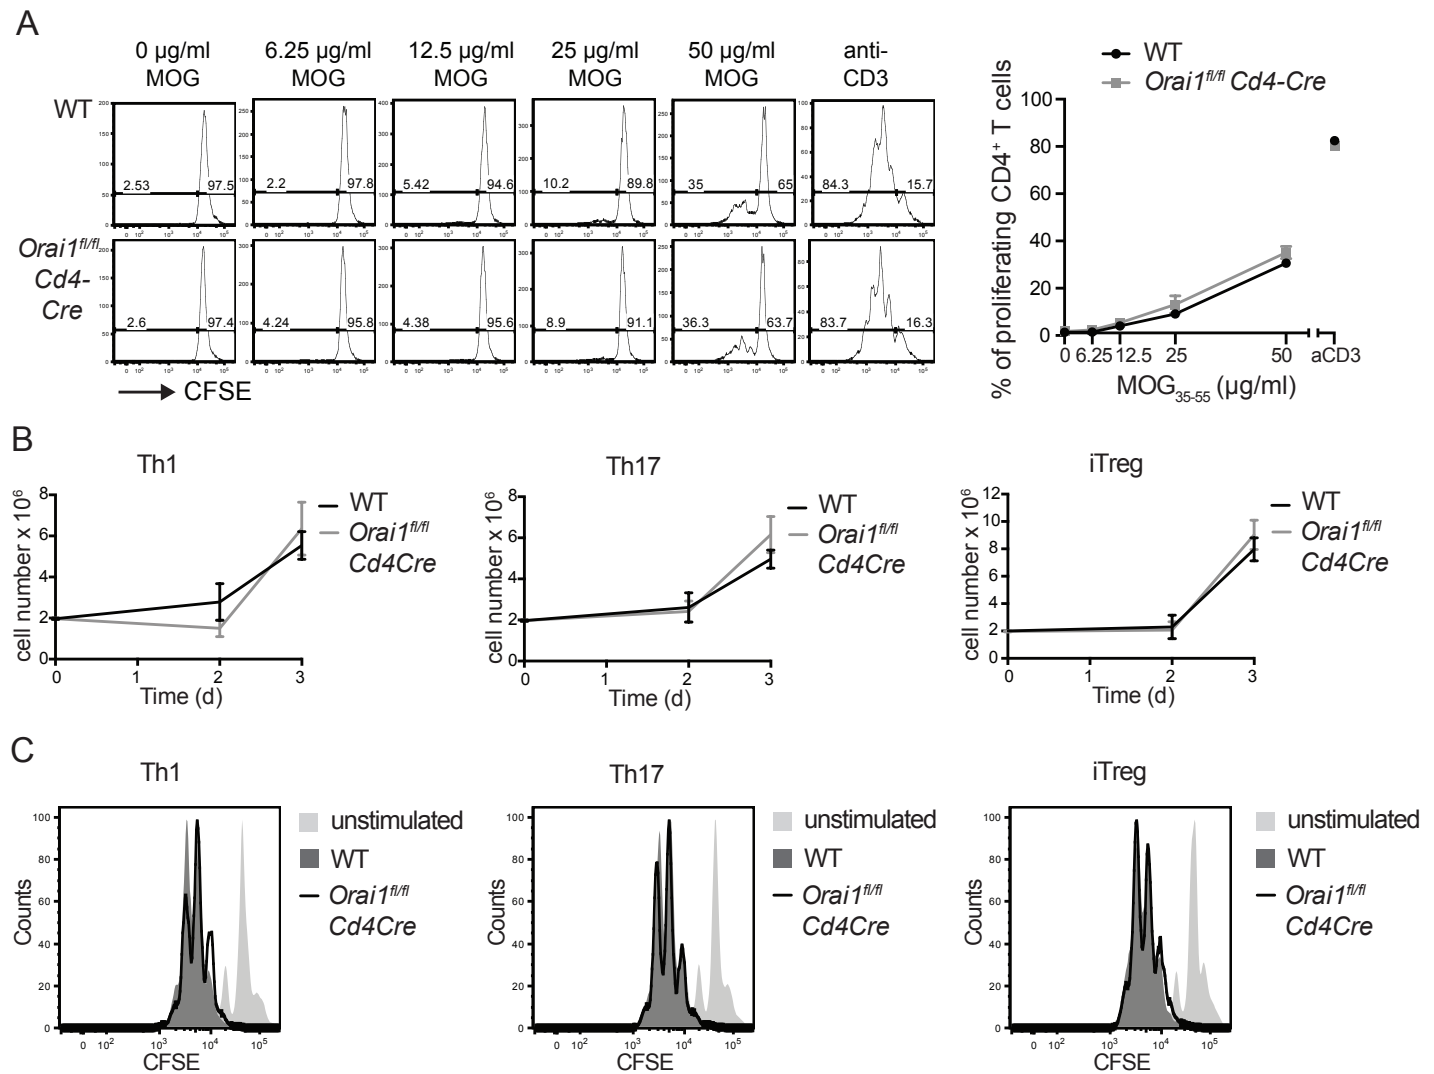

**Supporting Figure 1: Early T cell activation as well as proliferation of in vitro differentiated Th1, Th17 and iTreg cells was not impaired in *Orai1* deficient T cells.**

(A) WT and *Orai1<sup>fl/fl</sup> Cd4-Cre* mice were immunized with MOG<sub>35-55</sub> peptide but without PTX. At day 7 after immunization cells were isolated from spleen and draining LNs and stimulated with different concentrations of MOG<sub>35-55</sub> peptide (0-50 µg/ml) or anti-CD3 for 3 days in vitro. Cells were labeled with CFSE and 3 days later CD4<sup>+</sup> T cells were analyzed for CFSE dilution by flow cytometry. Histograms are representative of 5 mice per group and line graphs on the right represent the average ± SEM of 5 mice per group. Statistical analysis was performed using an unpaired Student's t test. (B, C) Naïve CD4<sup>+</sup> T cells from spleen and LNs of WT and *Orai1<sup>fl/fl</sup> Cd4-Cre* mice were cultured under Th1, Th17 and iTreg polarizing conditions for 3 days. (B) Cells were counted on day 0, 2 and 3. Line graphs represent the average cell number ± SEM for 3 mice per group. (C) Cells were labeled with CFSE and 3 days later analyzed for CFSE dilution by flow cytometry. Shown are representative flow cytometry plots.

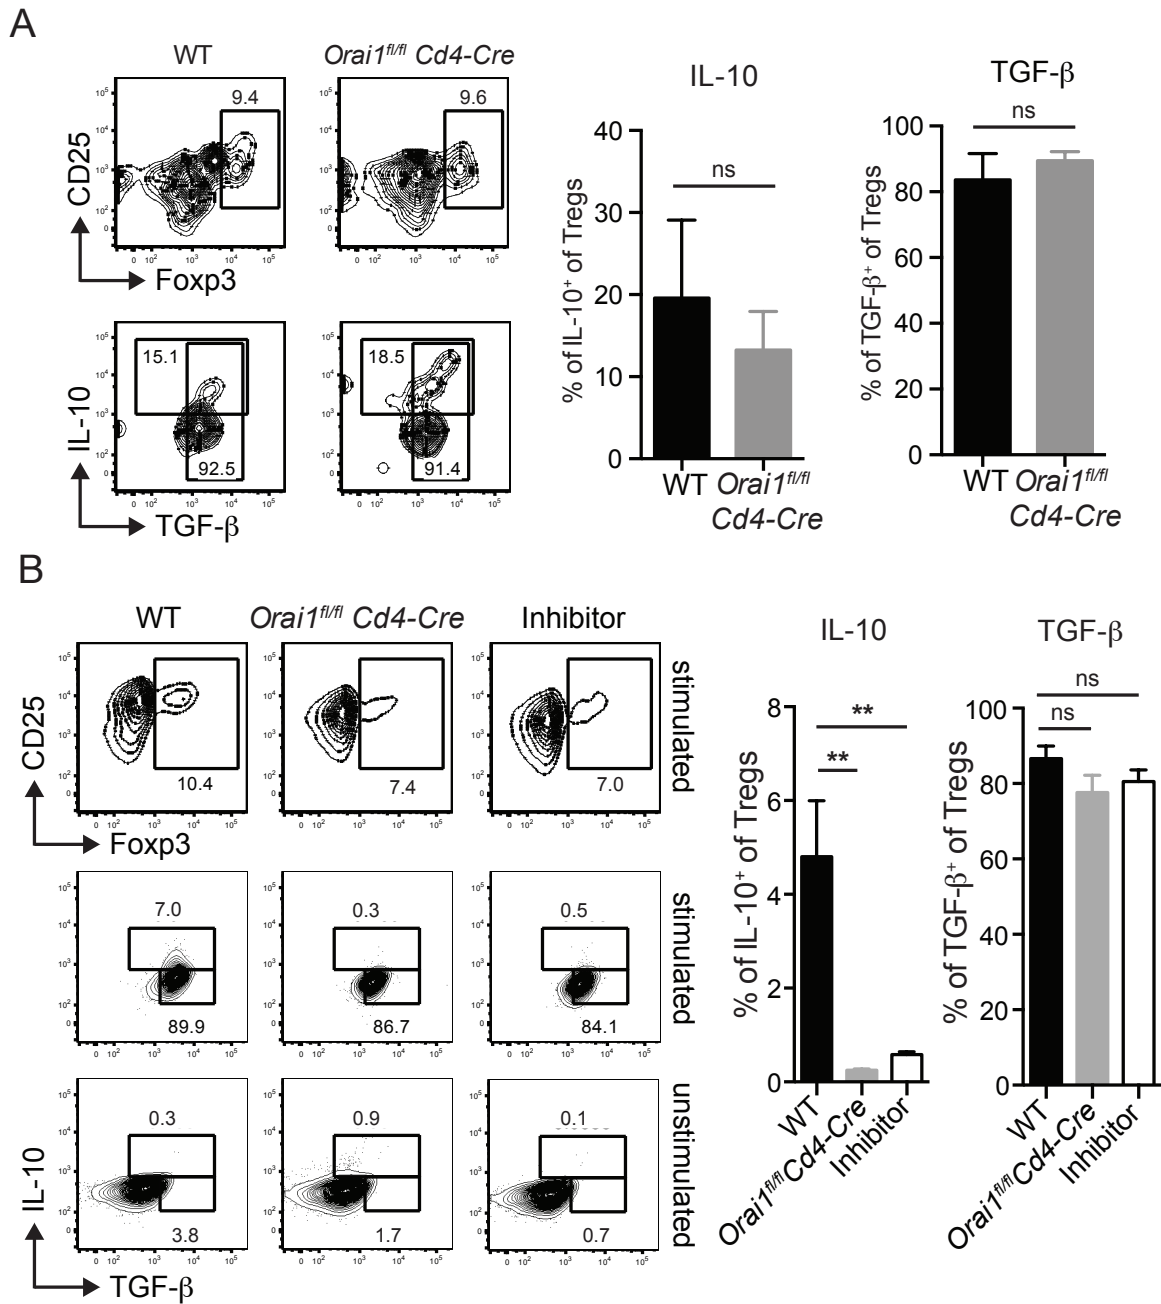

**Supporting Figure 2: IL-10 and TGF- $\beta$  expression in Treg cells isolated from the CNS of mice with EAE and iTReg cells differentiated in vitro.**

(A) EAE was induced in WT and *Orai1<sup>fl/fl</sup> Cd4-Cre* mice by immunization with MOG<sub>35-55</sub> peptide in CFA. Lymphocytes were isolated from the CNS on day 27 after immunization. Treg cells were identified by gating on CD4<sup>+</sup> CD25<sup>+</sup> Foxp3<sup>+</sup> cells. For cytokine staining, cells were stimulated with PMA and ionomycin in the presence of Brefeldin A for 6 h in vitro. IL-10 and TGF- $\beta$  expression was analyzed in CD4<sup>+</sup> CD25<sup>+</sup> Foxp3<sup>+</sup> Treg cells. Bar graphs represent the average of 4-6 mice per group. Statistical analysis was performed using an unpaired Student's t test. (B) CD4<sup>+</sup> T cells isolated from the spleen and LNs of WT and *Orai1<sup>fl/fl</sup> Cd4-Cre* mice were stimulated with anti-CD3/CD28 under iTReg polarizing conditions in vitro. The CRAC channel inhibitor AMG1 (100 nM) was added to some WT T cells (right column) on day 0 and was present throughout the iTReg cell differentiation (day 0-3). iTReg cells were left unstimulated or stimulated with PMA plus ionomycin for 6h in the presence of Brefeldin A. The frequency of IL-10 and TGF- $\beta$  expressing cells of all CD4<sup>+</sup> CD25<sup>+</sup> Foxp3<sup>+</sup> Treg cells was measured by flow cytometry. Data represent the average  $\pm$  SEM of 3 mice per group. Statistical analysis was performed using an unpaired Student's t test. \*\* p < 0.01.

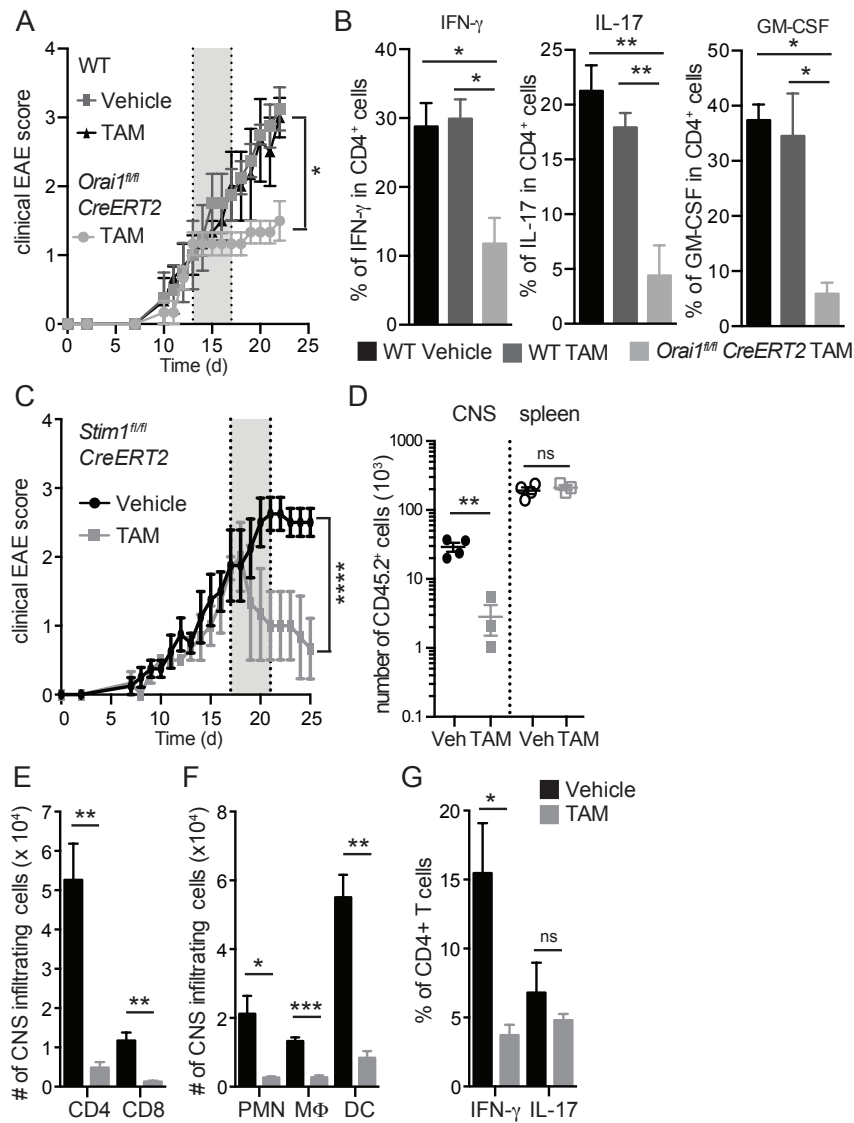

**Supporting Figure 3: Inducible deletion of *Orai1* and *Stim1* during ongoing EAE ameliorates disease severity.**

(A) EAE was induced in WT and *Orai1*<sup>fl/fl</sup> Cre-ERT2 mice by immunization with MOG<sub>35-55</sub> peptide in CFA. Mice were treated with 1 mg/kg tamoxifen (TAM) or vehicle (corn oil) control for 5 days starting from days 13-17 after immunization. Clinical disease scores were monitored daily. Data represent the average  $\pm$  SEM of 3-4 mice per group. (B) CD4<sup>+</sup> T cells were isolated from the CNS at day 22 after EAE induction and restimulated in vitro with PMA and ionomycin in the presence of Brefeldin A for intracellular cytokine analysis by flow cytometry. (C-G) For passive induction of EAE, *Stim1*<sup>fl/fl</sup> Cre-ERT2 and WT mice (CD45.2<sup>+</sup>) were immunized with MOG peptide. T cells were isolated from spleen and LNs 12 days later and restimulated in vitro with MOG peptide in the presence of IL-23 for 3 days.  $4 \times 10^6$  CD4<sup>+</sup> T cells were transferred i.v. into sublethally irradiated CD45.1 recipient mice. After EAE symptoms developed, recipient mice were injected with 1 mg/kg tamoxifen (TAM) or vehicle (corn oil) for 5 days (days 17-21 after T cell transfer). (C) Clinical EAE scores. (D) Absolute numbers of CD45.2<sup>+</sup> cells in CNS and spleen. (E) Absolute numbers of CD4<sup>+</sup> and CD8<sup>+</sup> T cells as well as (F) CD11b<sup>+</sup>Gr-1<sup>+</sup> polymorphonuclear cells (PMN), CD11b<sup>+</sup>CD11c<sup>+</sup>Gr-1<sup>-</sup> macrophages and CD11c<sup>+</sup>Gr-1<sup>-</sup> DC in the CNS 25 days after adoptive transfer. (G) Frequencies of CD4<sup>+</sup>IFN- $\gamma$ <sup>+</sup> and CD4<sup>+</sup>IL-17<sup>+</sup> T cells isolated from the CNS and restimulated in vitro with PMA and ionomycin for 6h. Data in C-G represent the average  $\pm$  SEM of 3-4 mice per group. Statistical analysis of EAE scores in A (days 13-22) and C (days 17-25) was performed using a Mann-Whitney test; data in panels B, D-G were analyzed using an unpaired Student's t test. \*  $p < 0.05$ , \*\*  $p < 0.005$ , \*\*\*  $p < 0.0005$ , \*\*\*\*  $p < 0.0001$ .

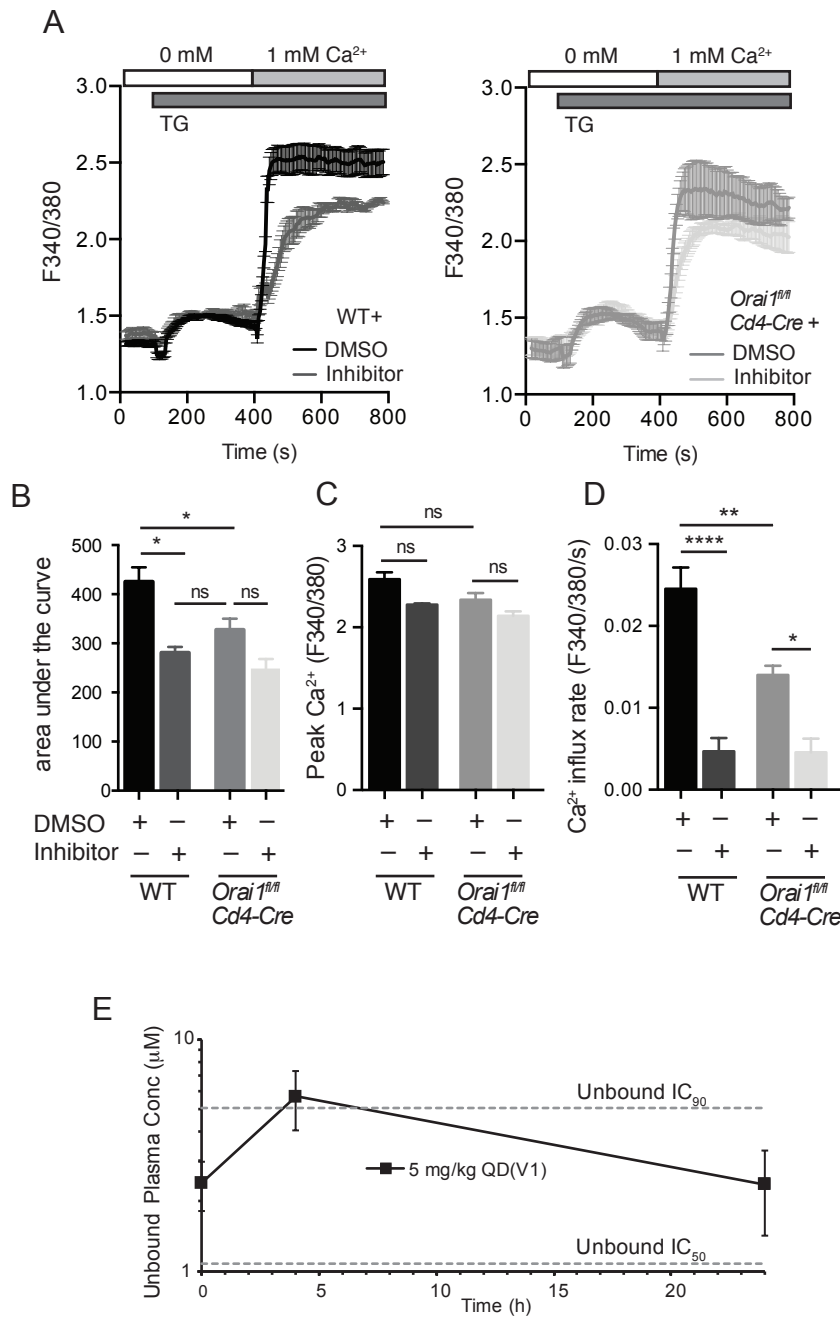

#### Supporting Figure 4: Specificity and pharmacokinetics of CRAC channel inhibitor AMG1.

(A) CD4<sup>+</sup> T cells were isolated from the spleen and LNs of WT and *Orai1<sup>fl/fl</sup>* *Cd4-Cre* mice, loaded with Fura-2 and incubated with 1000 nM AMG1 or DMSO in 0 mM Ca<sup>2+</sup> Ringer solution for 15 min prior to Ca<sup>2+</sup> measurements by FlexStation. Cells were stimulated with 1 µM Thapsigargin in Ca<sup>2+</sup> free buffer, followed by addition of 1 mM Ca<sup>2+</sup> Ringer solution. SOCE in experiments shown in A was quantified as the area under the curve (AUC) after Ca<sup>2+</sup> re-addition (400-800s) (B), peak Ca<sup>2+</sup> influx (C) and Ca<sup>2+</sup> influx rate (400-440s) (D). Data represent the average ± SEM from 3 repeat experiments. (E) Pharmacokinetics of the CRAC inhibitor AMG1 in BALB/c mice. Shown are the mean ± SD of AMG1 concentrations (nM) in the plasma of 5 female BALB/c mice after 10 days of QD dosing. Mice were administered 5 mg/kg inhibitor AMG1 for 10 days by oral gavage, and plasma concentrations measured at trough (0 h) prior to the final dose as well as 4 h and 24 h after final gavage of compound. Dotted lines represent the IC<sub>50</sub> and IC<sub>90</sub> concentrations for inhibition of IL-2 production by mouse splenocytes in vitro. Data in panels A-C were analyzed using a one-way ANOVA test. \* p < 0.05, \*\* p < 0.005, \*\*\*\* p < 0.0001.
